# Supplementary material for: Characterizing the Core-Shell Architecture of Block Copolymer Nanoparticles with Electron Microscopy: A Multi-Technique Approach
Source: PubMed Central journal article supplement (PMC7464915; doi:10.3390/polym12081656), 2020-07-25
Supplement: polymers-12-01656-s001.pdf [file polymers-12-01656-s001.pdf]

# Characterizing the Core-shell Architecture of Amphiphilic Block Copolymer Spherical Nanoparticles: A Multi-Technique Approach

Vitalii Tkachenko<sup>1,2</sup>, Loïc Vidal<sup>1,2</sup>, Ludovic Josien<sup>1,2</sup>, Marc Schmutz<sup>3</sup>, Julien Poly<sup>1,2</sup> and Abraham Chemtob<sup>1,2\*</sup>

<sup>1</sup> Université de Haute-Alsace, CNRS, IS2M UMR7361, F-68100 Mulhouse, France

<sup>2</sup> Université de Strasbourg, France

<sup>3</sup> Université de Strasbourg, CNRS, ICS UPR22, F-67034 Strasbourg, France

\* Correspondence: +33 3 8960 8834, abraham.chemtob@uha.fr

Received: 26 June 2020; Accepted: 17 July 2020; Published: 25 July 2020

|                                 |          |
|---------------------------------|----------|
| <b>Synthesis Protocol</b> ..... | <b>1</b> |
| <b>Additional Figures</b> ..... | <b>2</b> |
| <b>Additional Table</b> .....   | <b>7</b> |
| <b>References</b> .....         | <b>8</b> |

## Synthesis Protocol

Synthesis protocol of diblock copolymer nanoparticles *via* photomediated dispersion PISA of St (ex. poly(hydroxyethyl acrylate)-*b*-polystyrene – PHEA<sub>85</sub>-*b*-PS<sub>130</sub>). In a typical synthesis, PHEA<sub>85</sub>-TTC (0.838 g, 0.083 mmol) (TTC – S-cyanomethyl-S-dodecyltrithiocarbonate), Styrene (1.721 g, 16.528 mmol) and a methanol/water mixture (8.177 g/0.430 g, 95/5 w/w %) were charged into a Schlenk tube equipped with a stirring bar. The mixture was degassed by three freeze–pump–thaw cycles before being placed under nitrogen. The tube was then placed in a pre-heated oil bath at 35 °C and irradiated during 70 h in an immersion type photoreactor ( $\lambda = 472$  nm, 547 mW cm<sup>-2</sup>).

PS latex was prepared using semi-continuous emulsion polymerization. In this method, surfactant (SDS, 0.2024 g, 0.701 mmol) and initiator (ammonium persulfate, 0.0264 g, 0.116 mmol) were dissolved in water (40 g) and added to a glass reactor (Schlenk tube) equipped with a stainless steel stirrer, a reflux condenser, a sampling device, a nitrogen gas inlet tube, and a temperature probe. When the reaction temperature was reached (80 °C), the monomer (8.8 g, 84.5 mmol) was continuously fed (49 mg min<sup>-1</sup>) over a period of 3 h. At the end of monomer feeding, the system was maintained at the reaction temperature for 60 min to minimize the amount of residual monomer [1].

## Additional Figures

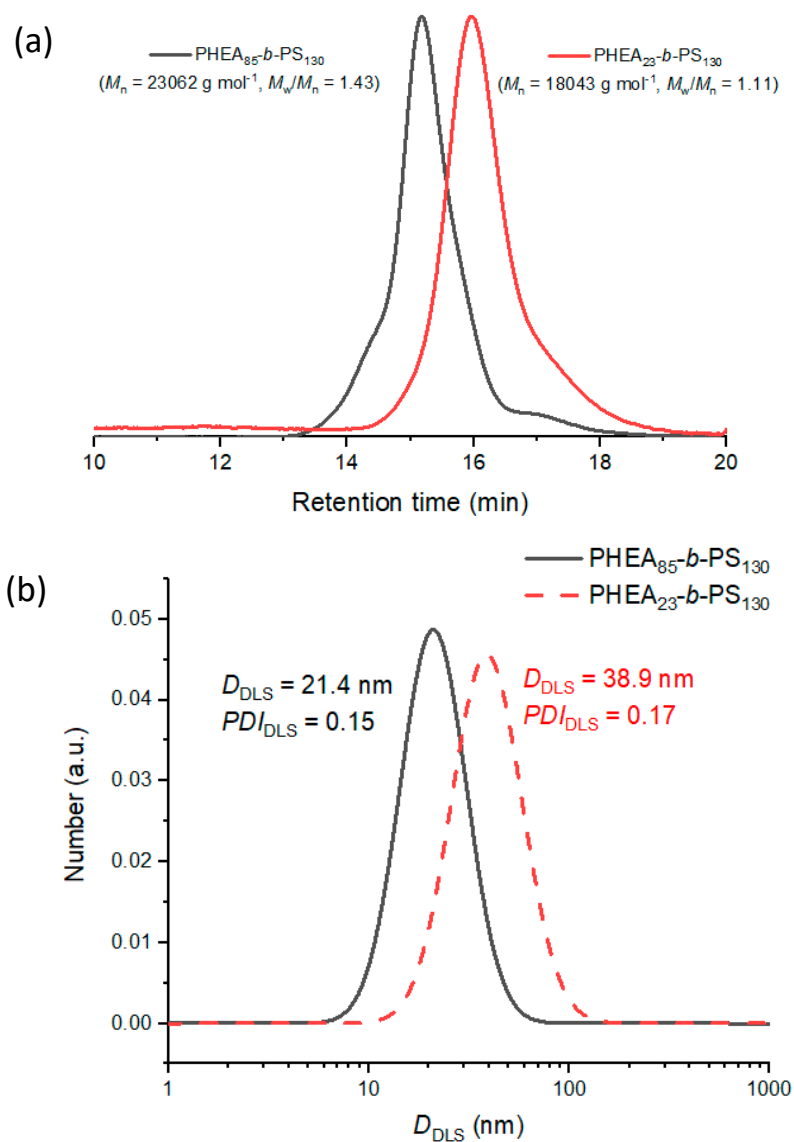

**Figure S1.** (a) SEC traces in DMF at 50 °C (refractive index detector) of PHEA<sub>85</sub>-*b*-PS<sub>130</sub> and PHEA<sub>23</sub>-*b*-PS<sub>130</sub> diblock copolymers. (b) Number-weighted size distributions (DLS data, cumulants method) of copolymer nanoparticles in MeOH/water (95/5 %vol.).

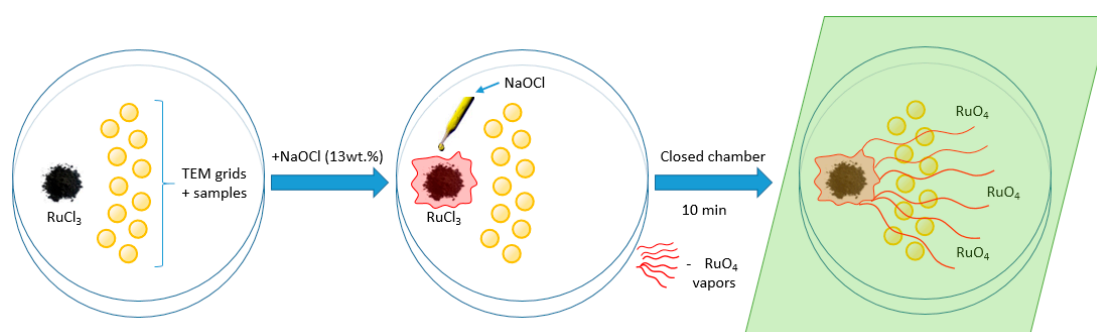

**Figure S2.** Schematic representation of positive staining technique and set-up.

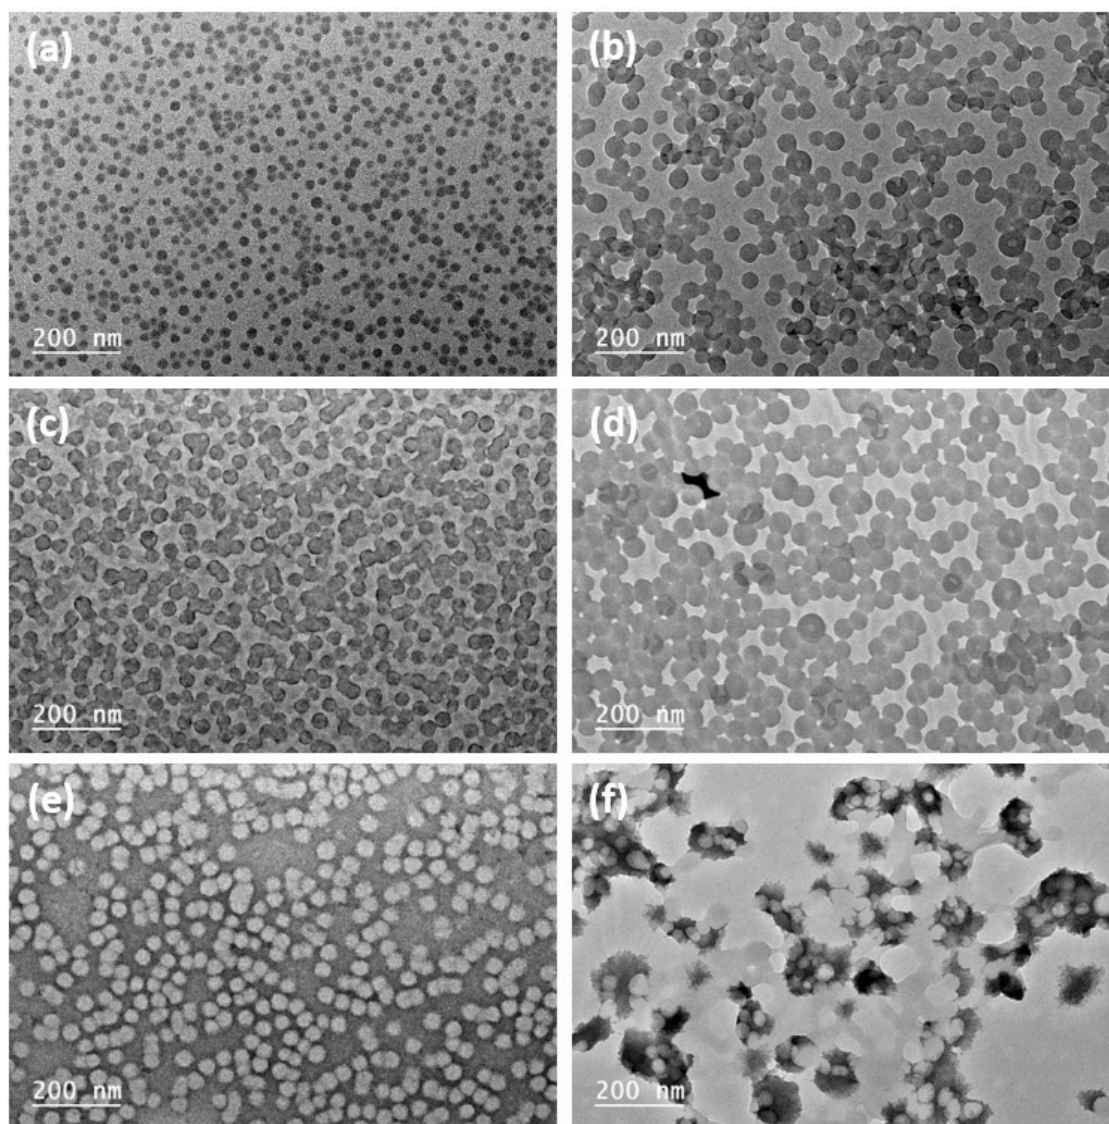

**Figure S3.** Low magnification TEM images of PHEA<sub>85</sub>-*b*-PS<sub>130</sub> (left column: a, c, e) and PHEA<sub>23</sub>-*b*-PS<sub>130</sub> (right column: b, d, f) nanoparticles. The first line is without staining, the second after RuO<sub>4</sub> positive staining, the third after negative staining.

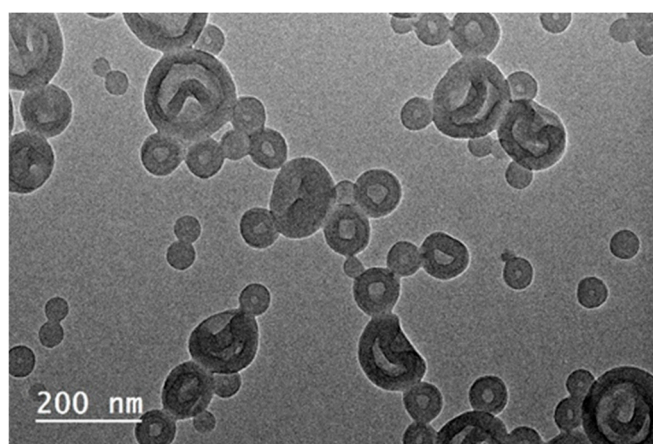

**Figure S4.** TEM image of vesicular nano-objects derived from air-dried unstained PHEA<sub>17</sub>-*b*-PS<sub>136</sub> copolymer.

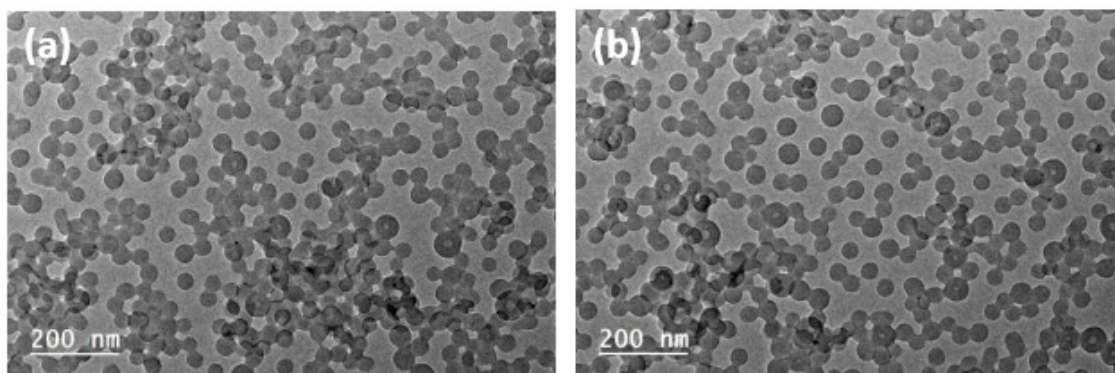

**Figure S5.** TEM images of air-dried unstained PHEA<sub>23</sub>-*b*-PS<sub>130</sub> block copolymer nanoparticles prepared at different concentrations: (a) 1 wt% and (b) 0.2 wt%.

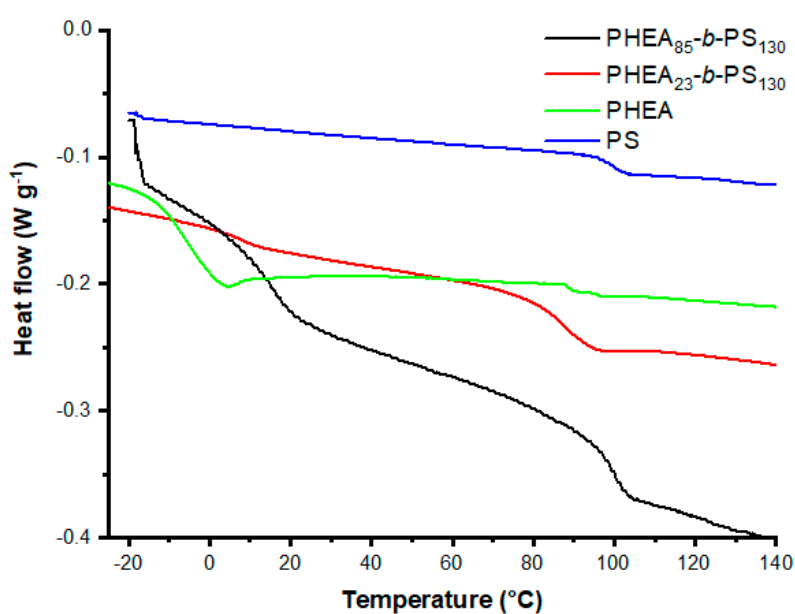

**Figure S6.** DSC traces of PHEA<sub>x</sub>-*b*-PS<sub>y</sub> diblock copolymer and individual blocks. Experimental conditions are detailed in Table S1.

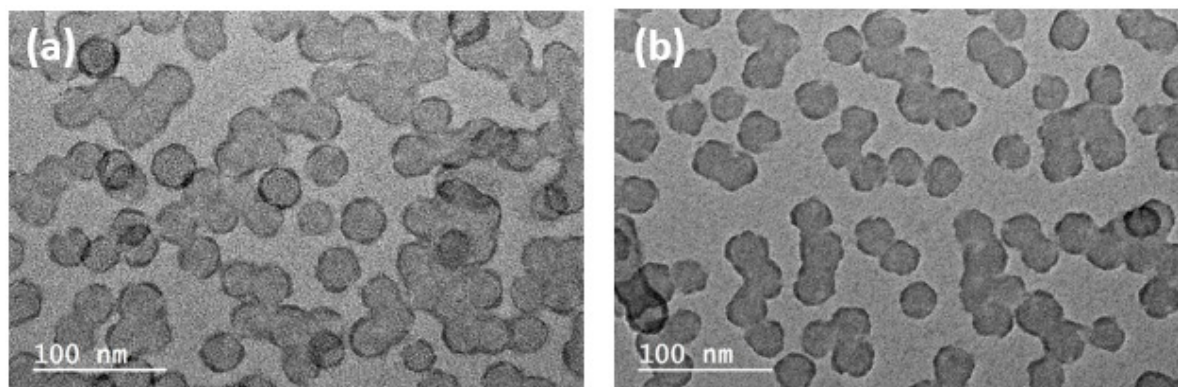

**Figure S7.** Effect of dialysis on TEM images: (a) without and (b) dialyzed PHEA<sub>85</sub>-*b*-PS<sub>130</sub> reaction mixture with subsequent RuO<sub>4</sub> staining.

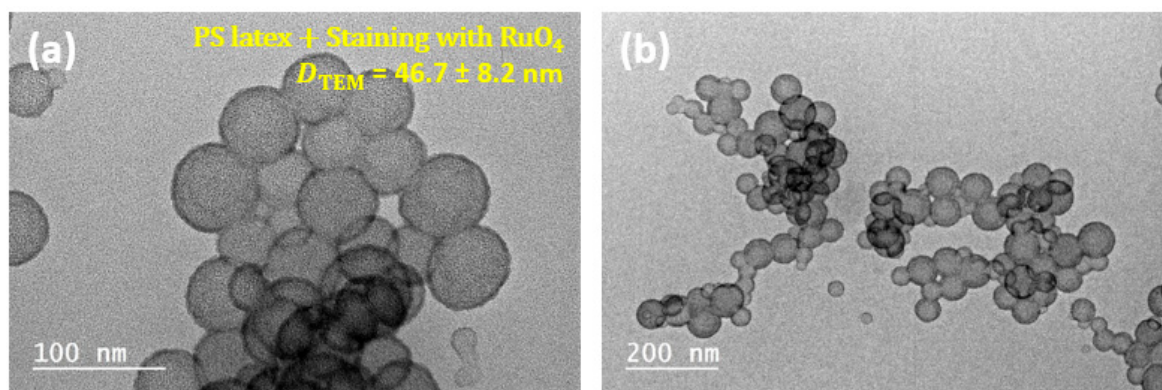

**Figure S8.** (a) TEM image of air-dried PS latex synthesized *via* feeding mode [1] stained with RuO<sub>4</sub>. (b) Corresponding low-magnification image.

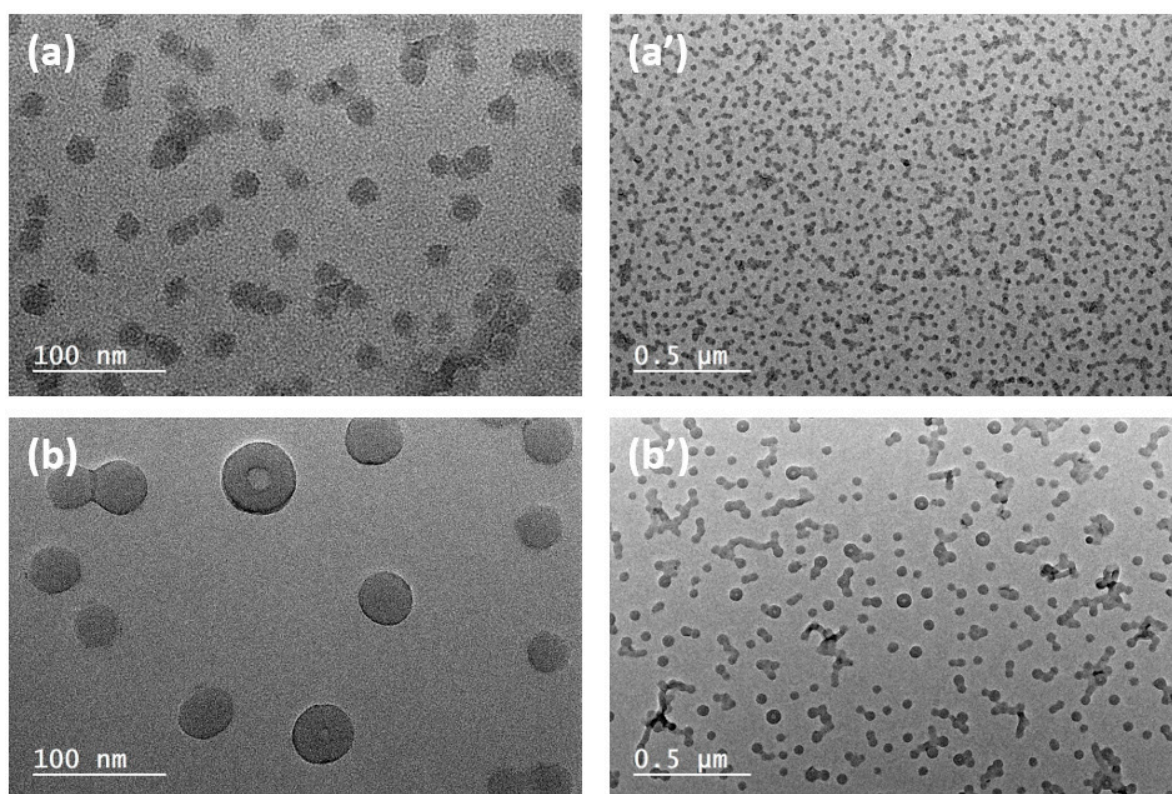

**Figure S9.** Positive stained TEM image of (a) PHEA<sub>85</sub>-*b*-PS<sub>130</sub> and (b) PHEA<sub>23</sub>-*b*-PS<sub>130</sub> with OsO<sub>4</sub>. (a', b'). Corresponding low magnification images.

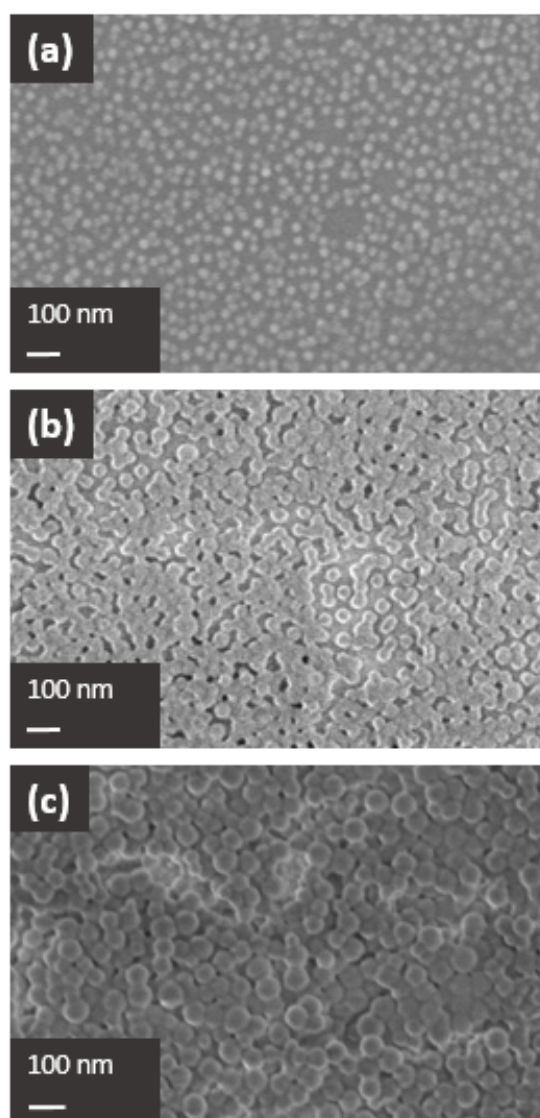

**Figure S10.** SEM images of (a) PHEA<sub>85</sub>-*b*-PS<sub>114</sub>, (b) PHEA<sub>25</sub>-*b*-PS<sub>118</sub> diblock copolymer based nanoparticles and (c) PS latex.

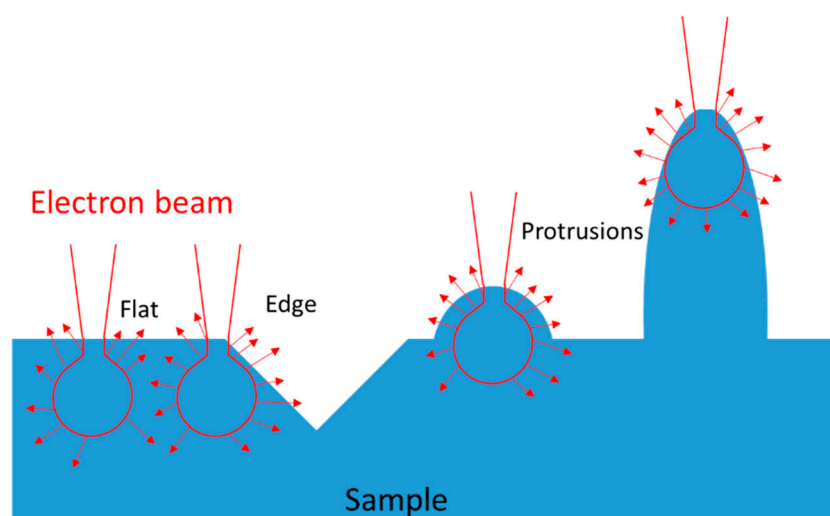

**Figure S11.** Schematic representation of the edge effect inspired from ref [2]. Particle edge or protrusions at particle surface appear brighter than plain surface through the escape of a larger number of secondary electrons.

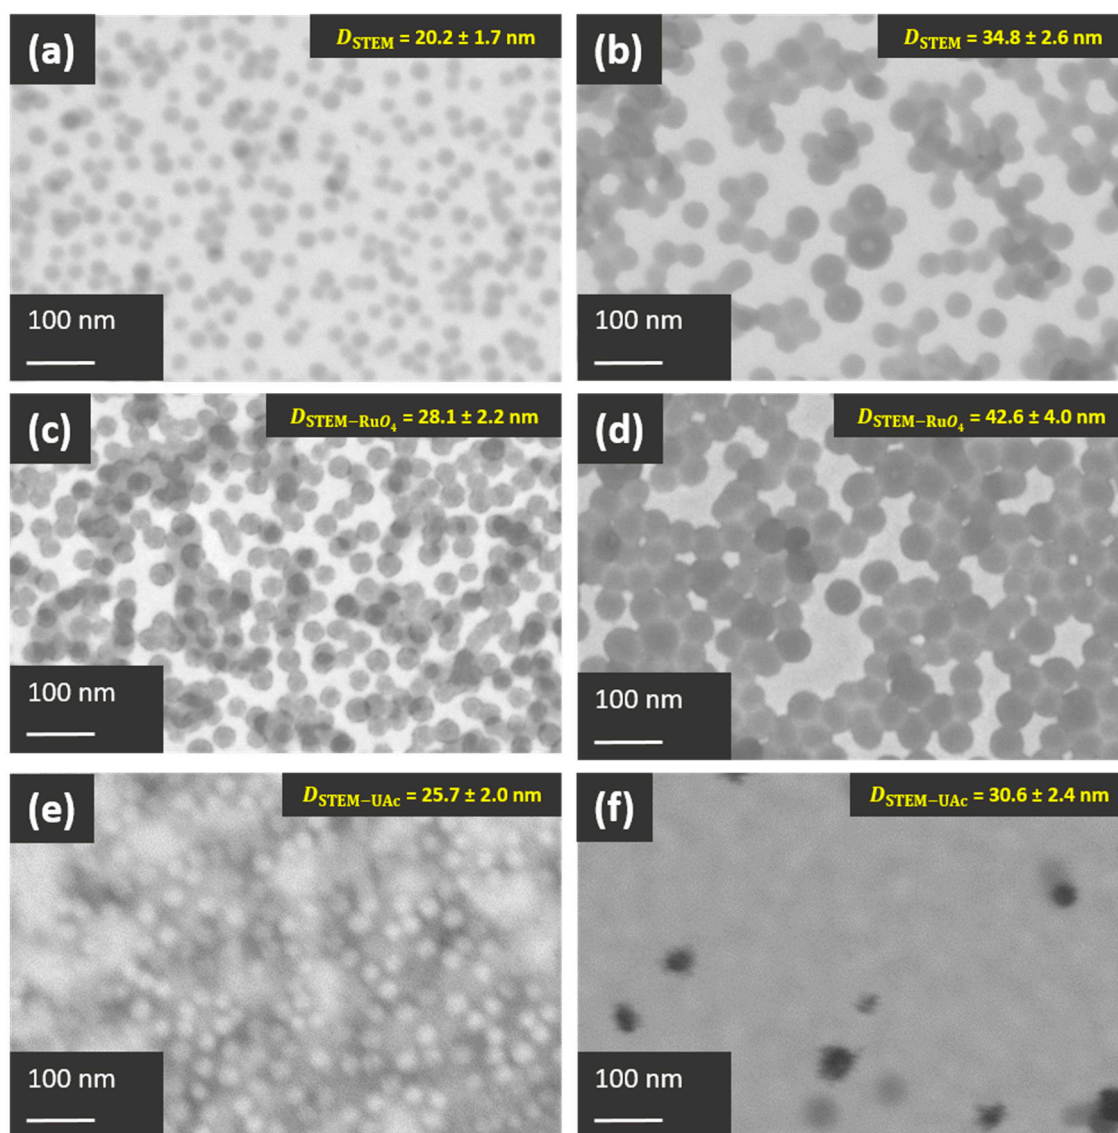

**Figure S12.** STEM images of (a) PHEA<sub>85</sub>-*b*-PS<sub>114</sub> and (b) PHEA<sub>25</sub>-*b*-PS<sub>118</sub> diblock copolymer based nanoparticles. STEM images with RuO<sub>4</sub> positive staining of (c) PHEA<sub>85</sub>-*b*-PS<sub>114</sub> and (d) PHEA<sub>25</sub>-*b*-PS<sub>118</sub> diblock copolymer based nanoparticles. STEM images with UAc negative staining of (e) PHEA<sub>85</sub>-*b*-PS<sub>114</sub> and (f) PHEA<sub>25</sub>-*b*-PS<sub>118</sub> diblock copolymer based nanoparticles.

## Additional Table

**Table S1.** Glass transition temperatures determined by differential scanning calorimetry. The copolymer and pure phase samples were heated from  $-50$  to  $150$  °C, cooled to  $-50$  °C, and reheated to  $150$  °C. The heating and cooling rates were  $\pm 10$  °C/min. Glass transition temperatures were determined during the third heating cycle.

| System                                           | $T_g^{\text{PHEA}}$ , °C | $T_g^{\text{PS}}$ , °C |
|--------------------------------------------------|--------------------------|------------------------|
| PHEA <sub>23</sub> - <i>b</i> -PS <sub>130</sub> | 10.7                     | 98.7                   |
| PHEA <sub>85</sub> - <i>b</i> -PS <sub>130</sub> | 7.0                      | 87.7                   |
| PHEA                                             | -7.3                     | -                      |
| PS                                               | -                        | 99                     |

$T_g^{\text{PHEA}}$  – Glass transition temperature of PHEA phase,  $T_g^{\text{PS}}$  – Glass transition temperature of PS phase.

## References

1. Nunes, J. de S.; Asua, J.M. Theory-Guided Strategy for Nanolatex Synthesis. *Langmuir* **2012**, *28*, 7333–7342, doi:10.1021/la3006647.
2. Ul-Hamid, A. *A Beginners' Guide to Scanning Electron Microscopy*; Springer International Publishing: Cham, 2018; ISBN 978-3-319-98481-0.
